# Supplementary material for: Disruption of a Plasmodium falciparum Multidrug Resistance-associated Protein (PfMRP) Alters Its Fitness and Transport of Antimalarial Drugs and Glutathione
Source: PubMed Central journal article supplement — J Biol Chem. 2009 Mar 20;284(12):7687–96. doi: 10.1074/jbc.M806944200 (PMC2658063; doi:10.1074/jbc.m806944200), 2009-03-20
Supplement: M806944200_1.pdf [file M806944200_1.pdf]

Supplementary Data

**DISRUPTION OF A *PLASMODIUM FALCIPARUM* MULTIDRUG  
RESISTANCE-ASSOCIATED PROTEIN (PfMRP) ALTERS ITS FITNESS AND  
TRANSPORT OF ANTIMALARIAL DRUGS AND GLUTATHIONE**

**Dipak Kumar Raj,<sup>‡</sup> Jianbing Mu,<sup>‡</sup> Hongying Jiang,<sup>‡</sup> Juraj Kabat<sup>§</sup>, Subash Singh,<sup>‡</sup>  
Margery Sullivan,<sup>‡</sup> Michael P. Fay,<sup>¶</sup> Thomas F. McCutchan,<sup>‡</sup> and Xin-zhuan Su<sup>‡1</sup>**

<sup>‡</sup>Laboratory of Malaria and Vector Research, <sup>§</sup> Research Technologies Branch, and <sup>¶</sup>Biostatistical  
Research Branch, National Institute of Allergy and Infectious Diseases, National Institutes of  
Health, Bethesda, Maryland 20892-8132, USA

<sup>1</sup>To whom correspondence should be addressed: Laboratory of Malaria and Vector  
Research, National Institute of Allergy and Infectious Diseases, National Institutes of Health,  
12735 Twinbrook Parkway, Room 3E-24B, Rockville, MD 20892-8132 USA. Fax 301-402-2201.  
E-mail xsu@niaid.nih.gov.

Running title: ABC transporter and drug resistance in malaria parasite

**Supplemental Table 1.** Microsatellites and their primer sequences used in typing parasites

| MS     | Forward Primer (5'-3')   | Reverse Primer (5'-3') |
|--------|--------------------------|------------------------|
| c1m4   | atatacctacaacggtaagca    | ttcttttgaggagtaatgt    |
| c1m67  | acaggattttgaagaaaaag     | taggataaatgtagctttag   |
| c4m62  | gaattcacttaaagtattttattg | atgaagtatccattcgttt    |
| c4m68  | cacatttatatgtatatgtga    | acaataacttaaagtggac    |
| c13m13 | gttataagtagtagcagacga    | tatacattacgggtattttaa  |
| c13m63 | agagatactatgattatttta    | atattacaaagcttactacc   |
| c14m17 | acacaaagagaataggtata     | tagtaattctagtttaccta   |
| b5m124 | taataagtgtgaagaaatagga   | ataaaacagagcaaaataaag  |
| b5m5   | taaataatacaactactaatga   | attgatccatatttatatctc  |
| bm17   | aacgatatgtggtatgataaa    | aaaaaaaaagatgcgcacac   |

**Supplemental Table 2.** Amino acid substitution in PfMRP and quinine IC<sub>50</sub> for parasites from South America

| Parasite | Origin   | aa191 | aa437 | QN (nM) |
|----------|----------|-------|-------|---------|
| PC15     | Peru     | Y     | A     | 707.4   |
| PC09     | Peru     | Y     | A     | 463.4   |
| PC26     | Peru     | Y     | A     | 286.9   |
| DIV17    | Brazil   | H     | S     | 270.7   |
| DIV14    | Brazil   | Y     | A     | 231.7   |
| ICS      | Brazil95 | Y     | A     | 222.6   |
| ECP      | Brazil95 | H     | S     | 208.8   |
| PC17     | Peru     | Y     | A     | 204.8   |
| JAV      | Columbia | Y     | A     | 201.8   |
| PC49     | Peru     | H     | A     | 184.7   |
| 7G8      | Brazil   | H     | S     | 157.4   |
| PAD      | Brazil95 | H     | S     | 113.3   |
| DIV30    | Brazil   | H     | S     | 112.2   |
| ECU      | Ecuador  | H     | S     | 84.9    |

Drug data were obtained using radioactive hypoxanthine incorporation method. The IC<sub>50</sub> data were reported previously (1).

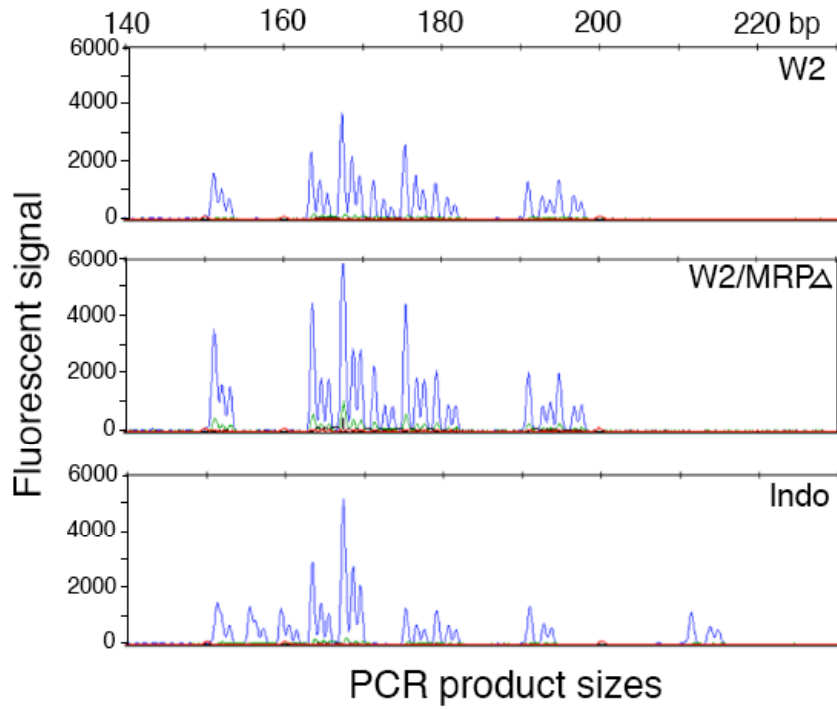

**Supplemental Figure 1.** Parasite typing using a multiple copy microsatellite marker PfRRM (2). W2, W2/MRP $\Delta$ , and Indo from Indochina (a parasite that was cultured at the same time) were typed with PfRRM. Same patterns were observed for W2 and W2/MRP $\Delta$ .

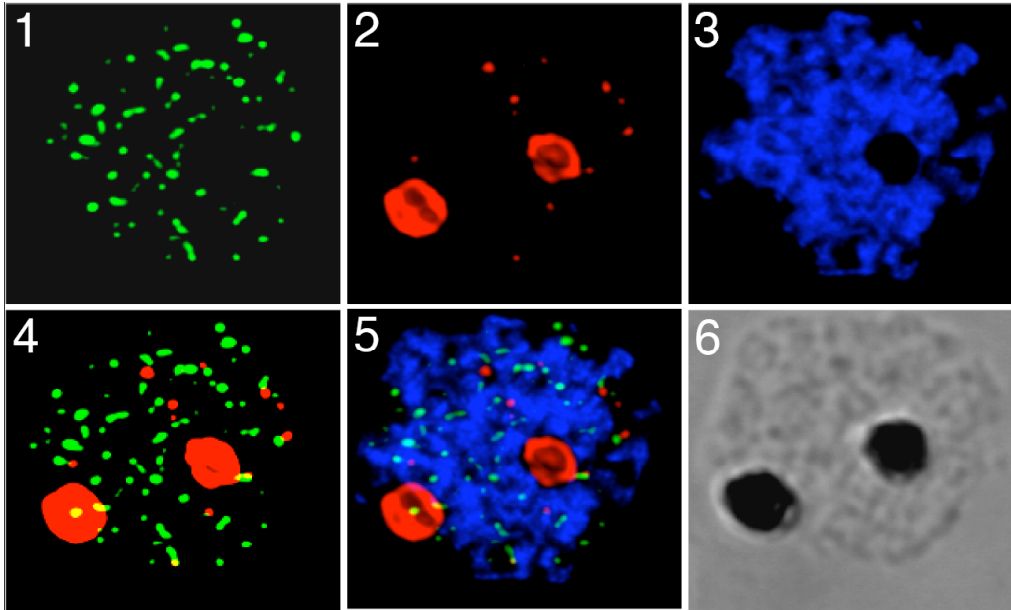

**Supplemental Figure 2.** Immunofluorescent assay (IFA) localization of PfMRP and PfCRT in mature schizonts and merozoites. 1, anti-PfMRP; 2, anti-PfCRT, staining food vacuoles; 3, DAPI; 4, merged images of 1 and 2; 5, merged image of 1-3; and 6, differential interference contrast (DIC).

1. Mu, J., Ferdig, M. T., Feng, X., Joy, D. A., Duan, J., Furuya, T., Subramanian, G., Aravind, L., Cooper, R. A., Wootton, J. C., Xiong, M., and Su, X.-z. (2003) *Mol Microbiol* **49**, 977-989
2. Su, X.-z., Carucci, D. J., and Wellems, T. E. (1998) *Exp Parasitol* **89**, 262-265
